# Supplementary material
Source: publisher figshare collection journal article supplement (https://aacr.figshare.com/ndownloader/files/39831240)
Supplement: Supplementary file 1 [file 39831240]

## Supplementary Figure Legends

**Figure S1.** Lyn and Hck expression levels in breast cancer cell lines. Cell lysates were Western blotted as indicated. For the Hck blot, two haematopoietic cell lines were included as positive controls.

**Figure S2.** Phosphorylation of Met Y1234/35 in mouse mammary tumours. The panels show immunofluorescent staining of frozen sections of p53 null and MMTV-PyMT tumours. Main images are 200x magnification with inset images at 400x. All scale bars = 50  $\mu$ m.

**Figure S3.** Inhibition of FAK and Lyn function by small molecule inhibitor and knockdown approaches. A, Inhibition of FAK kinase activity using PF-562271. Cells were treated with vehicle (DMSO) or inhibitor for 24 h. Western blotting was undertaken as indicated. B, Confirmation of FAK knockdowns by different siRNAs. NTC, non-targetting control. C, Confirmation of Lyn knockdown by different siRNAs. In the upper panel, note that the Lyn knockdowns also abolish bands corresponding to active Lyn, which are detected by an antibody against the phosphorylated SFK activation loop.
